# Supplementary material for: Top-Down Proteomics Identifies Plasma Proteoform Signatures of Liver Cirrhosis Progression
Source: PubMed Central journal article supplement — bioRxiv. 2024 Jun 19:2024.06.19.599662. Preprint. [Version 1] doi: 10.1101/2024.06.19.599662 (PMC11212939; doi:10.1101/2024.06.19.599662), 2024-06-19
Supplement: NIHPP2024.06.19.599662v1-supplement-1.pdf [file NIHPP2024.06.19.599662v1-supplement-1.pdf]

## Supplementary Figures

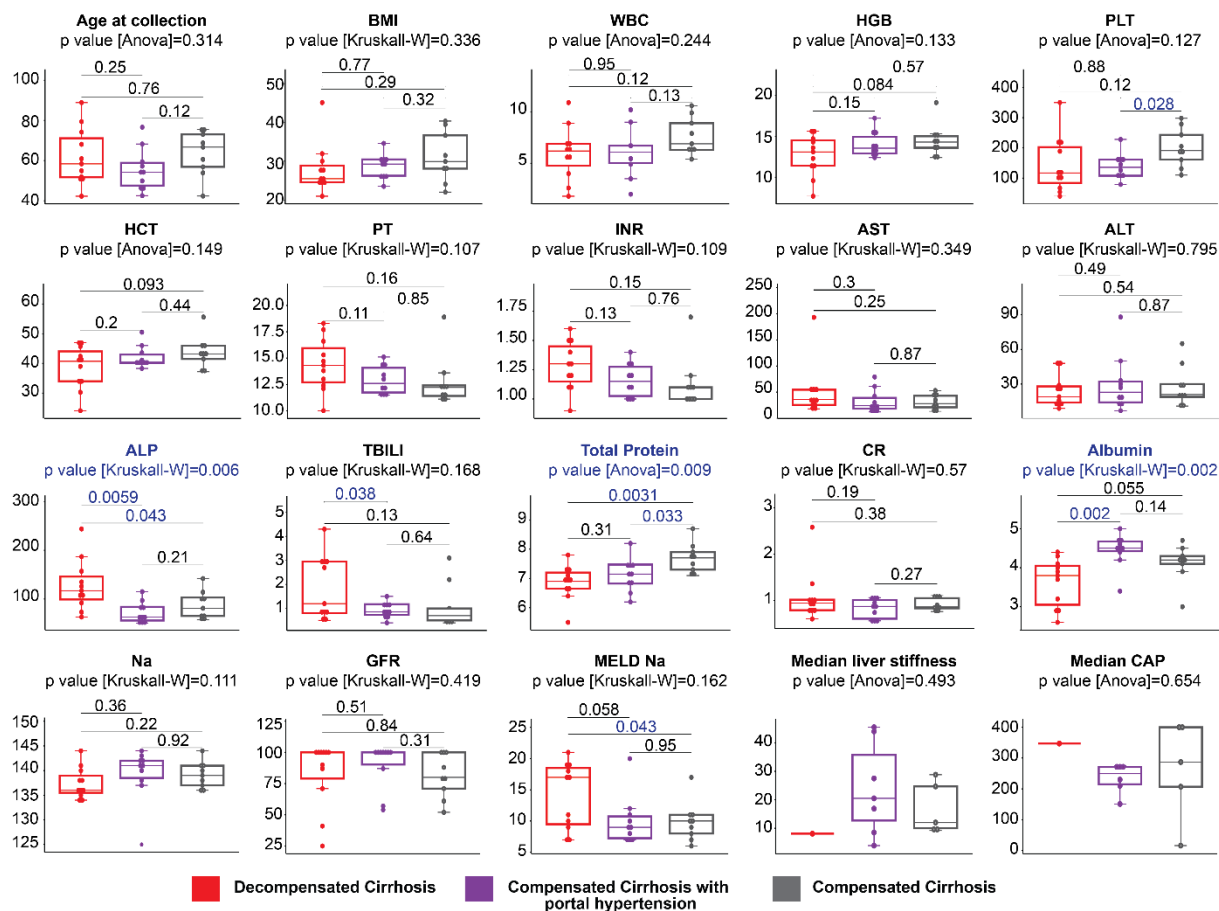

**Figure S1. Clinical parameters of patients enrolled in this study.** Clinical parameters shown in blue are statistically significant different among groups. Significance ( $p$  value  $< 0.05$ ) was calculated by Anova or Kruskal-Wallis (Kruskall-W) tests, depending on the data distribution determined by Shapiro test. Abbreviations: BMI (body mass index), WBC (white blood cell count), HGB (hemoglobin), PLT (platelets), HCT (hematocrit), PT (prothrombin time), INR (international normalized ratio), AST (aspartate aminotransferase), ALT (alanine aminotransferase), ALP (alkaline phosphatase), TBILI (total bilirubin), CR (serum creatinine), Na (Sodium), GFR (glomerular filtration rate), MELD-Na (Model for End Stage Liver Disease Sodium), CAP (controlled attenuation parameter).

## Proteoform identification in liver cirrhosis progression

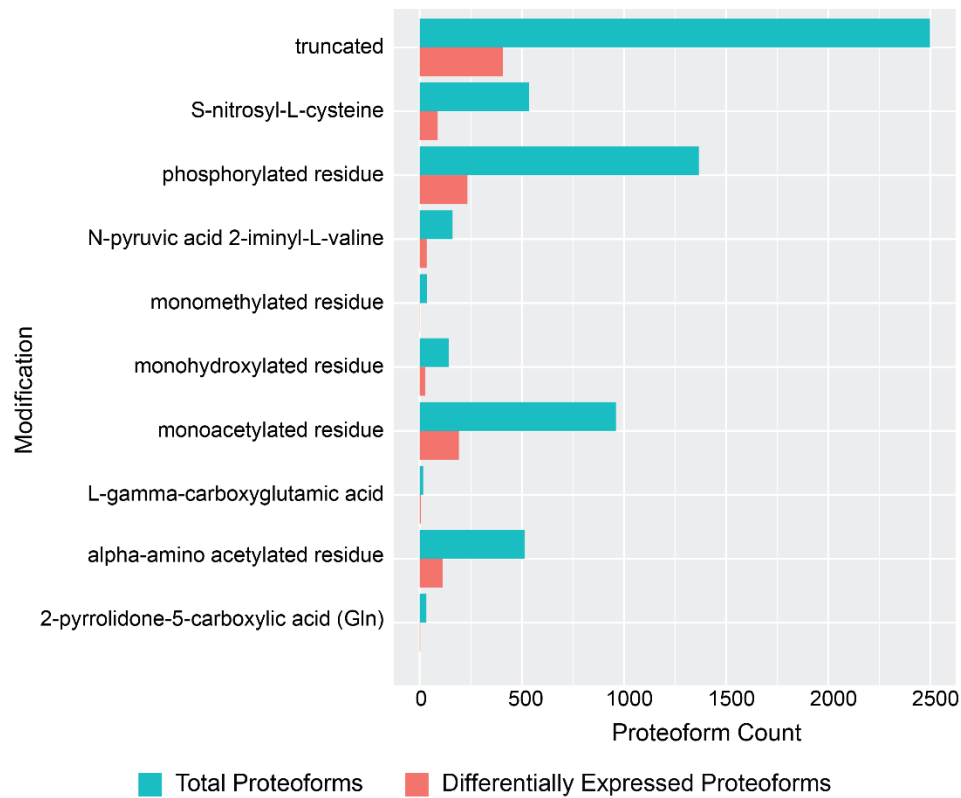

**Figure S2. T Common proteoform modifications detected in the TDP analysis.** The number of truncations and top-10 most common post-translational modifications identified in the total and differentially expressed proteoforms (DEPs) captured in the discovery LC-MS/MS TDP analysis.

## Proteoform identification in liver cirrhosis progression

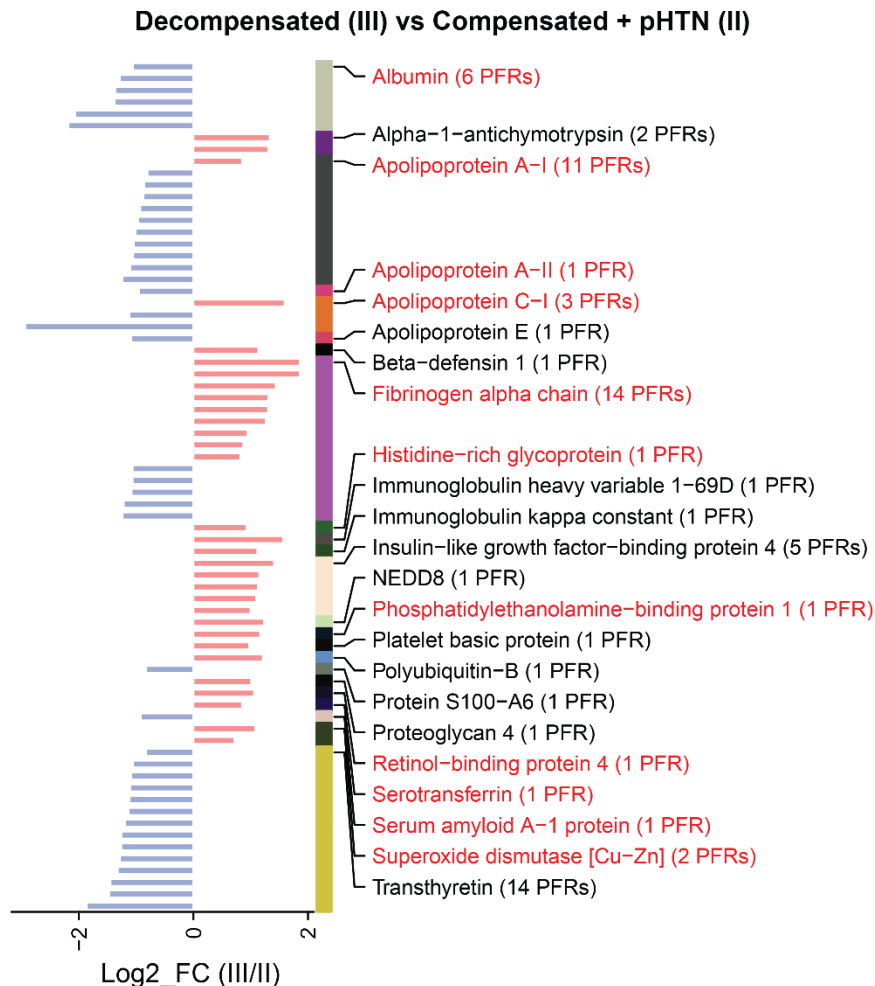

**Figure S3. Differentially expressed proteoforms (DEPs) from decompensated (III) vs compensated with portal hypertension (+ pHTN) (II) patients.** DEPs are grouped by proteins, and then ordered by fold change. The protein and number of DEPs derived from that protein are shown to figure right. For example, fibrinogen alpha chain had 14 DEPs identified. Proteins highlighted in red are enriched in liver at a transcriptional level. Abbreviations: PFR (proteoform).

## Proteoform identification in liver cirrhosis progression

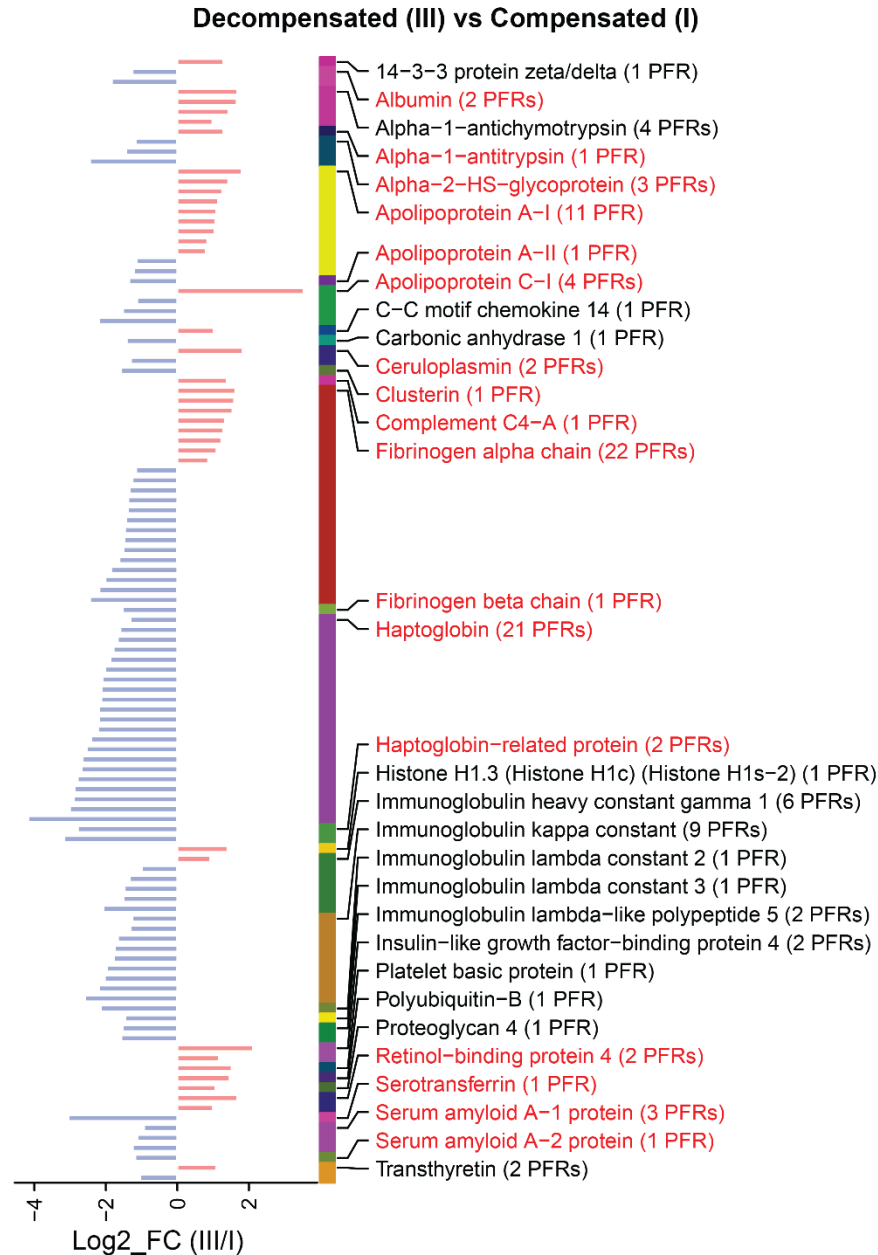

**Figure S4.** . Differentially expressed proteoforms (DEPs) from decompensated (III) vs compensated (I) patients. DEPs are grouped by proteins, and then ordered by fold change. The protein and number of DEPs derived from that protein are shown to figure right. For example, haptoglobin related protein had 2 DEPs identified. Proteins highlighted in red are enriched in liver at a transcriptional level. Abbreviations: PFR (proteoform).

## Proteoform identification in liver cirrhosis progression

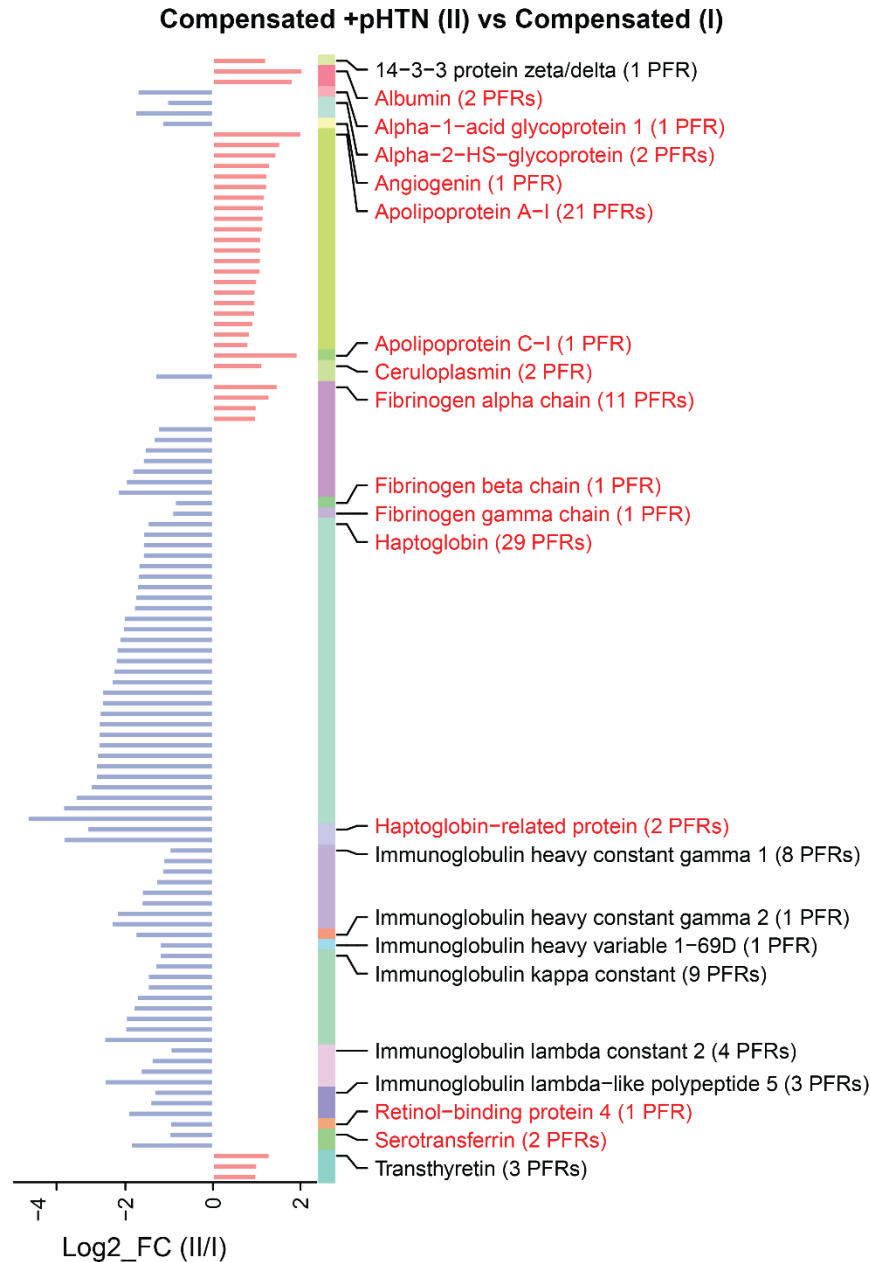

**Figure S5. Differentially expressed proteoforms (DEPs) from compensated with portal hypertension (+ pHTN) (II) vs compensated (I) patients.** DEPs are grouped by proteins, and then ordered by fold change. The protein and number of DEPs derived from that protein are shown to figure right. For example, haptoglobin related protein had 2 DEPs identified. Proteins highlighted in red are enriched in liver at a transcriptional level. Abbreviations: PFR (proteoform).

## Proteoform identification in liver cirrhosis progression

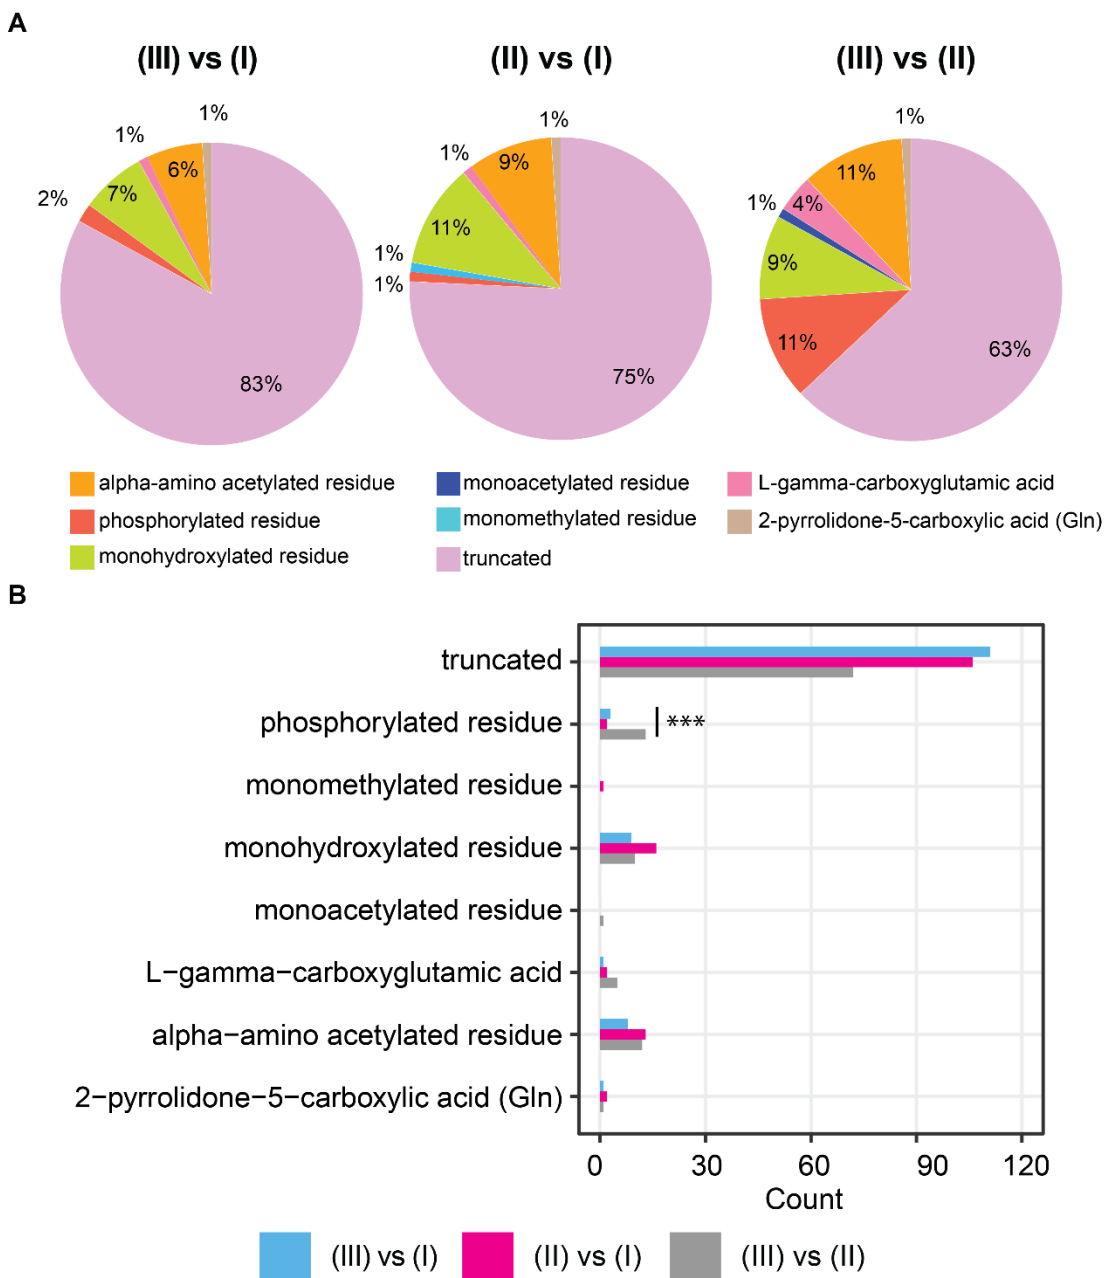

**Figure S6. Proteoform modifications in pairwise comparisons of cirrhosis stages. A)** Percentages and **B)** absolute number of differentially expressed proteoform (DEP) modifications identified in pairwise comparisons of Stage III vs I, II vs I, and III vs II. For example, 11% of

## Proteoform identification in liver cirrhosis progression

proteoforms differentially expressed between Stages III and II were phosphorylated residues (red portion of pie chart). Statistical significance was calculated with the Fisher exact test (adj.  $p$ -values: \*\*\*<0.001, \*\*<0.01, \*<0.05).

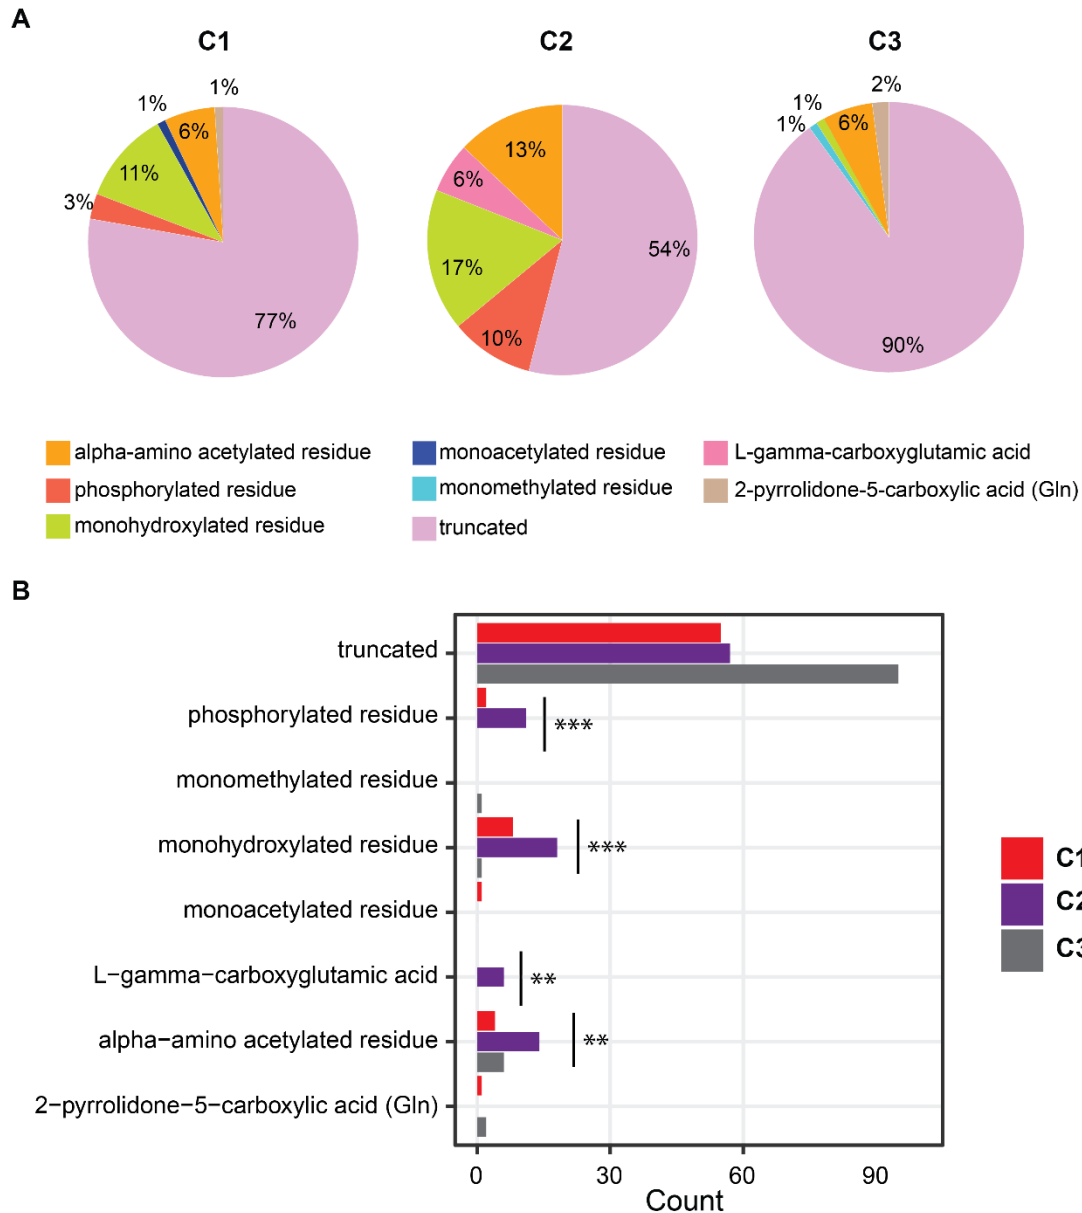

**Figure S7. Proteoform modifications compared across clusters. A) Percentages and B) Absolute number of differentially expressed proteoform (DEP) modifications identified in clusters 1 (C1), 2 (C2), and C3. For example, 90% of modifications to DEPs that clustered into C3 were**

## Proteoform identification in liver cirrhosis progression

identified as truncations (light purple portion of the pie chart). Statistical significance was calculated with the Fisher exact test (adj. *p*-values: \*\*\*<0.001, \*\*<0.01, \*<0.05).

|                                         | Compensated cirrhosis (I) | Compensated cirrhosis + pHTN (II) | Decompensated cirrhosis (III) |                |
|-----------------------------------------|---------------------------|-----------------------------------|-------------------------------|----------------|
|                                         | 3                         | 2                                 | 1                             | <b>Cluster</b> |
| <b>Fibrinogen alpha chain (36 DEPs)</b> | <b>14</b>                 | <b>7</b>                          | <b>15</b>                     | <b>DEPs</b>    |
| Truncations                             | 14                        | 7                                 | 15                            | <b>Mods</b>    |
| PRF lenght                              | 58                        | 58.86                             | 126                           |                |
| Phosphorylation                         | -                         | 1                                 | 3                             |                |
| Mono hydroxylation                      | 1                         | 1                                 | 3                             |                |
| <b>Apolipoprotein A-I (32 DEPs)</b>     | -                         | <b>22</b>                         | <b>10</b>                     | <b>DEPs</b>    |
| Truncations                             |                           | 22                                | 9                             | <b>Mods</b>    |
| α-amino acetylation                     |                           | 8                                 | -                             |                |
| Mono hydroxylation                      |                           | 25                                | 6                             |                |
| Mutations P27-->H                       |                           | 2                                 | -                             |                |
| <b>Haptoglobin (29 DEPs)</b>            | <b>29</b>                 | -                                 | -                             | <b>DEPs</b>    |
| Isoforms                                | 2                         |                                   |                               | <b>Mods</b>    |
| Truncations                             | 29                        |                                   |                               |                |
| α-amino acetylation                     | 4                         |                                   |                               |                |
| Mutations E71-->K N70-->D               | 10<br>2<br>8              |                                   |                               |                |

**Figure S8. Most common, liver-enriched differentially expressed proteoforms (DEPs) identified in TDP analysis.** DEPs relative to Fibrinogen alpha chain, Apolipoprotein A-I, and Haptoglobin are reported together with their modifications in the 3 clusters established in **Figure 2**. Proteins are shown with the number of DEPs in parentheses. Abbreviations: DEP (Differentially expressed proteoform), Mod (Modification).



## Proteoform identification in liver cirrhosis progression

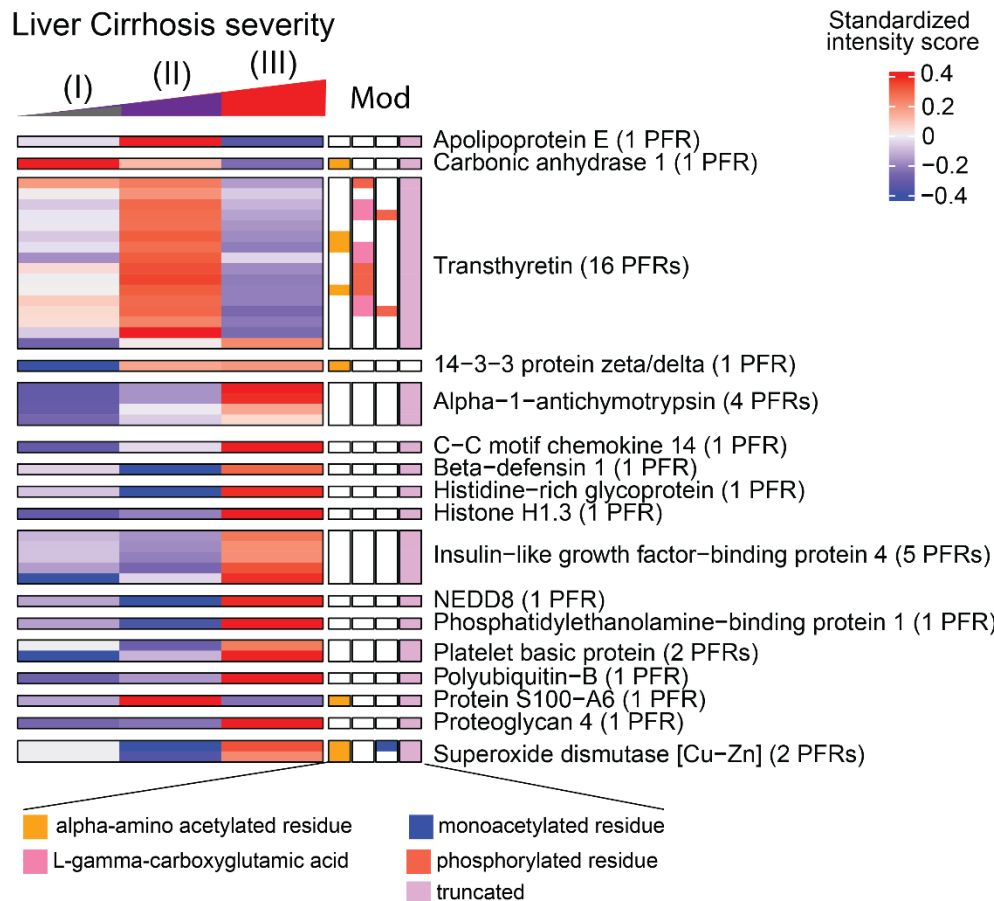

**Figure S9. Heatmaps of quantified proteoforms of proteins not enriched in the liver at transcriptional level.** Associated proteoform modifications are shown and defined by the figure legend. The proteins and number of identified proteoforms derived from each protein are shown to figure right. Abbreviations: PFR (proteoform), Mod (modification).

## Proteoform identification in liver cirrhosis progression

| PFR     | Protein                   | Uniprot ID | Sequence | Mutation | Phosphorylation | Mono hydroxylation | Half Cysteine | Methylation | Alpha amino acetylation |
|---------|---------------------------|------------|----------|----------|-----------------|--------------------|---------------|-------------|-------------------------|
| 16559   | Apolipoprotein C-I        | P02654     | 29-83    |          |                 |                    |               |             |                         |
| 7510185 | Albumin                   | P02768-3   | 25-277   |          | S-82, 89        |                    | C-77, 86      |             |                         |
| 7033240 | Apolipoprotein A-I        | P02647     | 67-267   |          |                 | M-110,136          |               |             |                         |
| 7052923 | Apolipoprotein A-I        | P02647     | 35-267   |          |                 | M-110,136          |               |             |                         |
| 47927   | Apolipoprotein A-II       | P02652     | 19-100   |          |                 |                    |               |             |                         |
| 38719   | Apolipoprotein C-I        | P02654     | 27-83    |          |                 |                    |               |             |                         |
| 18702   | Fibrinogen alpha chain    | P02671     | 542-601  |          |                 |                    |               |             | yes                     |
| 2383017 | Fibrinogen alpha chain    | P02671     | 538-604  |          |                 |                    |               |             |                         |
| 6720044 | Fibrinogen alpha chain    | P02671     | 561-604  |          |                 |                    |               |             |                         |
| 6720045 | Fibrinogen alpha chain    | P02671     | 549-604  |          |                 |                    |               |             |                         |
| 6720672 | Fibrinogen alpha chain    | P02671     | 539-604  |          |                 |                    |               |             |                         |
| 7654834 | Fibrinogen alpha chain    | P02671     | 557-603  |          |                 |                    |               |             |                         |
| 74009   | Serum amyloid A-1 protein | P0DJ18     | 20-122   |          |                 |                    |               |             |                         |
| 5435552 | Serum amyloid A-1 protein | P0DJ18     | 21-122   | G90-->D  |                 |                    |               |             | yes                     |
| 215903  | Serum amyloid A-2 protein | P0DJ19     | 20-122   | R89-->H  |                 |                    |               |             |                         |
| 6700458 | Fibrinogen gamma chain    | P02679     | 281-436  | M410-->V |                 |                    |               |             |                         |
| 6542874 | Retinol-binding protein 4 | P02753     | 19-194   | A73-->T  |                 |                    |               | R-139       |                         |
| 215854  | Serotransferrin           |            | 636-698  |          |                 |                    |               |             |                         |

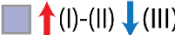

↑(I)-(II) ↓(III)



↑(I) ↓(III)



↑(I) ↓(II)

**Figure S10. Individual proteoforms upregulated in early-stage cirrhosis.** Differentially expressed proteoforms (DEPs) significantly upregulated in stages (I) and (II) and downregulated in stage (III) (dark purple), upregulated in stage (I) and downregulated in stage (III) (light purple), upregulated in stage (I) and downregulated in stage (II) (yellow). Each proteoform is shown with its unique proteoform number, protein name, Uniprot ID, amino acid sequence relative to the Uniprot ID, any relevant mutations, and presence or absence of post-translational modifications. Colors are based on the proteoform signatures created in **Figure 4**. Abbreviations: PFR (proteoform).

\*Note that half Cysteine could be artifact during the identification process.

## Proteoform identification in liver cirrhosis progression

| PFR     | Protein                    | Uniprot ID | Sequence  | Mutation | Mono hydroxylation | Half Cysteine  | Alpha amino acetylation | 2-pyrrolidone-5-carboxylic acid |
|---------|----------------------------|------------|-----------|----------|--------------------|----------------|-------------------------|---------------------------------|
| 7233558 | Albumin                    | P02768-3   | 25-325    |          |                    | C-77, 86, 325  |                         |                                 |
| 7493196 | alpha-1acid glycoprotein 1 | P02763     | 165-201   |          |                    |                |                         |                                 |
| 18967   | alpha-2HS glycoprotein     | P02765     | 341 - 367 |          |                    |                |                         |                                 |
| 56322   | alpha-2HS glycoprotein     | P02765     | 275 - 339 |          |                    |                |                         |                                 |
| 74004   | alpha-2HS glycoprotein     | P02765     | 342 - 367 |          |                    |                |                         |                                 |
| 5931629 | Angiogenin                 | P03950     | 25-147    | Q36-->L  |                    | C50,81,105,131 |                         | Q25                             |
| 99695   | Apolipoprotein C-I         | P02654     | 29-83     |          |                    |                | yes                     |                                 |
| 7411348 | Ceruloplasmin              | P00450     | 20-58     |          |                    |                |                         |                                 |
| 53707   | Clusterin                  | P10909     | 414-449   |          |                    |                |                         |                                 |
| 345982  | Fibrinogen alpha chain     | P02671     | 542-604   |          | P-565              |                |                         |                                 |
| 6618516 | Fibrinogen alpha chain     | P02671     | 551-603   |          |                    |                |                         |                                 |
| 6700442 | Fibrinogen alpha chain     | P02671     | 537-604   |          |                    |                |                         |                                 |
| 6707159 | Fibrinogen alpha chain     | P02671     | 438-519   |          |                    | C-491          |                         |                                 |
| 6732079 | Fibrinogen alpha chain     | P02671     | 561-603   |          |                    |                |                         |                                 |
| 6755154 | Fibrinogen alpha chain     | P02671     | 549-603   |          |                    |                |                         |                                 |
| 6788241 | Fibrinogen alpha chain     | P02671     | 538-605   |          |                    |                |                         |                                 |
| 7164381 | Fibrinogen alpha chain     | P02671     | 537-599   |          |                    |                |                         |                                 |
| 7584008 | Fibrinogen alpha chain     | P02671     | 549-605   |          |                    |                |                         |                                 |
| 7587565 | Fibrinogen alpha chain     | P02671     | 451-496   |          |                    |                |                         |                                 |
| 73949   | Haptoglobin                | P00738-2   | 19-102    |          |                    |                |                         |                                 |
| 73950   | Haptoglobin                | P00738-2   | 19-101    |          |                    |                |                         |                                 |
| 73951   | Haptoglobin                | P00738-2   | 19-100    |          |                    |                |                         |                                 |
| 73952   | Haptoglobin                | P00738-2   | 22-101    |          |                    |                |                         |                                 |
| 73953   | Haptoglobin                | P00738-2   | 19-102    |          |                    |                | yes                     |                                 |
| 379773  | Haptoglobin                | P00738-1   | 104-160   |          |                    |                |                         |                                 |
| 597885  | Haptoglobin                | P00738-2   | 18-101    |          |                    |                |                         |                                 |
| 4927920 | Haptoglobin                | P00738-2   | 19-101    |          |                    | C-52, 86       |                         |                                 |
| 5055588 | Haptoglobin                | P00738-2   | 19-102    | E71-->K  |                    |                | yes                     |                                 |
| 5055594 | Haptoglobin                | P00738-2   | 19-101    |          |                    |                | yes                     |                                 |
| 5269396 | Haptoglobin                | P00738-2   | 19-102    | N70-->D  |                    | C-52           |                         |                                 |
| 5269397 | Haptoglobin                | P00738-2   | 19-101    | N70-->D  |                    | C-90           |                         |                                 |
| 5269398 | Haptoglobin                | P00738-2   | 19-101    | N70-->D  |                    | C-86           |                         |                                 |
| 5710193 | Haptoglobin                | P00738-2   | 19-101    | N70-->D  |                    | C-52           |                         |                                 |
| 5865702 | Haptoglobin                | P00738-2   | 19-102    | E71-->K  |                    | C-52,86        | yes                     |                                 |
| 6372014 | Haptoglobin                | P00738-2   | 19-102    | N70-->D  |                    | C-90           |                         |                                 |
| 6476920 | Haptoglobin                | P00738-1   | 78-160    |          |                    |                |                         |                                 |
| 6720057 | Haptoglobin                | P00738-1   | 106-160   |          |                    |                |                         |                                 |
| 6721265 | Haptoglobin                | P00738-1   | 78-161    |          |                    | C-86           |                         |                                 |
| 6889832 | Haptoglobin                | P00738-1   | 78-160    |          |                    | C-86           |                         |                                 |
| 7111729 | Haptoglobin                | P00738-2   | 22-101    | N70-->D  |                    | C-90           |                         |                                 |
| 7488813 | Haptoglobin                | P00738-1   | 106-161   |          |                    |                |                         |                                 |
| 7488879 | Haptoglobin                | P00738-2   | 17-101    |          |                    |                |                         |                                 |
| 7591703 | Haptoglobin                | P00738-1   | 82-160    |          |                    | C-86,111       |                         |                                 |
| 7839836 | Haptoglobin                | P00738-2   | 22-101    | N70-->D  |                    | C-52           |                         |                                 |
| 7839837 | Haptoglobin                | P00738-1   | 75-160    |          |                    | C-86           |                         |                                 |
| 7841882 | Haptoglobin                | P00738-2   | 19-100    | N70-->D  |                    | C-52           |                         |                                 |
| 7841883 | Haptoglobin                | P00738-1   | 19-101    |          |                    | C-86           |                         |                                 |
| 7863012 | Haptoglobin                | P00738-1   | 97-160    |          |                    | C-111          |                         |                                 |

□ ↑ (I) ↓ (II)-(III)

**Figure S11. Individual proteoforms upregulated in Stage I disease.** Differentially expressed proteoforms (DEPs) significantly upregulated in stage (I) and downregulated in stages (II) and (III) (blue). Each proteoform is shown with its unique proteoform number, protein name, Uniprot ID, amino acid sequence relative to the Uniprot ID, any relevant mutations, and presence or absence of post-translational modifications. Colors are based on the proteoform signatures created in **Figure 4**. Abbreviations: PFR (proteoform).

\*Note that half Cysteine could be artifact during the identification process.

## Proteoform identification in liver cirrhosis progression

| PFR     | Protein                   | Uniprot ID | Sequence | Mutation | Phosphorylation | Mono hydroxylation | Half Cysteine | Alpha amino acetylation |
|---------|---------------------------|------------|----------|----------|-----------------|--------------------|---------------|-------------------------|
| 7047846 | Albumin                   | P02768-1   | 25-157   |          | S-82, 89        |                    | C-77          |                         |
| 7841902 | Albumin                   | P02768-1   | 25-288   |          | S-82            |                    |               |                         |
| 56323   | Apolipoprotein A-I        | P02647     | 19-267   |          |                 |                    |               | yes                     |
| 216392  | Apolipoprotein A-I        | P02647     | 25-267   |          |                 | M-110              |               |                         |
| 5052079 | Apolipoprotein A-I        | P02647     | 25-267   |          |                 | M-110              |               | yes                     |
| 5052090 | Apolipoprotein A-I        | P02647     | 25-266   | P27-->H  |                 |                    |               | yes                     |
| 5508504 | Apolipoprotein A-I        | P02647     | 19-267   |          |                 | M-110,136          |               | yes                     |
| 6372372 | Apolipoprotein A-I        | P02647     | 23-267   |          |                 |                    |               |                         |
| 6468740 | Apolipoprotein A-I        | P02647     | 9-267    |          |                 | M-110              |               | ↓(I) ↑(II)              |
| 6472353 | Apolipoprotein A-I        | P02647     | 18-267   |          |                 | M-110,136          |               |                         |
| 6478105 | Apolipoprotein A-I        | P02647     | 12-267   |          |                 | M-110              |               |                         |
| 6481626 | Apolipoprotein A-I        | P02647     | 25-266   |          |                 | M-110              |               | yes                     |
| 6481628 | Apolipoprotein A-I        | P02647     | 25-266   |          |                 | M-110,136          |               | yes                     |
| 6799836 | Apolipoprotein A-I        | P02647     | 9-267    |          |                 | M-110,136          |               |                         |
| 6981680 | Apolipoprotein A-I        | P02647     | 25-266   |          |                 | M-136              |               | yes                     |
| 345984  | Fibrinogen alpha chain    | P02671     | 542-603  |          |                 | P-565              |               |                         |
| 5052085 | Apolipoprotein A-I        | P02647     | 25-267   |          |                 | M-136              |               |                         |
| 6472160 | Apolipoprotein A-I        | P02647     | 23-267   |          |                 | M-110,136          |               |                         |
| 6472193 | Apolipoprotein A-I        | P02647     | 5-267    |          |                 | M-110              |               |                         |
| 6563625 | Apolipoprotein A-I        | P02647     | 5-267    |          |                 |                    |               |                         |
| 6571467 | Apolipoprotein A-I        | P02647     | 30-267   |          |                 |                    |               |                         |
| 6686623 | Apolipoprotein A-I        | P02647     | 27-267   |          |                 |                    |               |                         |
| 6788235 | Apolipoprotein A-I        | P02647     | 6-267    |          |                 |                    |               |                         |
| 7013512 | Apolipoprotein A-I        | P02647     | 14-267   |          |                 |                    |               |                         |
| 7072437 | Apolipoprotein A-I        | P02647     | 29-267   |          |                 | M-110              |               |                         |
| 7497747 | Apolipoprotein A-I        | P02647     | 27-265   |          |                 | M-110              |               |                         |
| 4664283 | Apolipoprotein C-I        | P02654     | 13-83    |          |                 |                    |               | ↓(I) ↑(II) ↑(III)       |
| 597908  | Ceruloplasmin             | P00450     | 910-1065 |          |                 |                    |               |                         |
| 74946   | Complement C4-A           | P0C0L4     | 680-755  |          |                 |                    |               |                         |
| 53596   | Fibrinogen alpha chain    | P02671     | 576-629  |          |                 |                    |               |                         |
| 74881   | Fibrinogen alpha chain    | P02671     | 600-629  |          |                 |                    |               |                         |
| 367042  | Fibrinogen alpha chain    | P02671     | 548-629  |          |                 | P-565              |               |                         |
| 6700460 | Fibrinogen alpha chain    | P02671     | 459-629  |          |                 |                    |               |                         |
| 7811927 | Fibrinogen alpha chain    | P02671     | 592-628  |          |                 |                    |               |                         |
| 6678845 | Retinol-binding protein 4 | P02753     | 19-201   |          |                 |                    | C-192         |                         |
| 6686230 | Retinol-binding protein 4 | P02753     | 19-201   |          |                 |                    | C-88          |                         |
| 6372540 | Alpha-1-antitrypsin       | P001009    | 339-418  |          |                 |                    |               |                         |
| 6372550 | Apolipoprotein A-I        | P02647     | 21-267   |          |                 |                    |               |                         |
| 6481673 | Apolipoprotein A-I        | P02647     | 1-267    |          |                 | M-110              |               |                         |
| 597831  | Fibrinogen alpha chain    | P02671     | 548-629  |          |                 |                    |               | ↓(I) ↑(III)             |
| 6707163 | Fibrinogen alpha chain    | P02671     | 444-629  |          |                 |                    |               |                         |
| 7179072 | Fibrinogen alpha chain    | P02671     | 515-629  |          |                 |                    |               |                         |
| 7501917 | Fibrinogen alpha chain    | P02671     | 466-629  |          | P-565           | S-501              |               |                         |

**Figure S12. Individual proteoforms upregulated in late-stage cirrhosis.** Differentially expressed proteoforms (DEPs) significantly downregulated in stage (I) and upregulated in stage (II) (green), downregulated in stage (I) and upregulated in stages (II) and (III) (red), downregulated in stage (I) and upregulated in stage (III) (orange). Each proteoform is shown with its unique proteoform number, protein name and Uniprot ID, amino acid sequence relative to the Uniprot ID, and presence or absence of post-translational modifications. Colors are based on the proteoform signatures created in **Figure 4**. Abbreviations: PFR (proteoform).

\*Note that half Cysteine could be artifact
